# Supplementary material for: Genome-wide analysis of transcription factors related to anthocyanin biosynthesis in carmine radish (Raphanus sativus L.) fleshy roots
Source: PeerJ. 2019 Nov 7;7:e8041. doi: 10.7717/peerj.8041 (PMC6842556; doi:10.7717/peerj.8041)
Supplement: Supplemental Information 2 [file peerj-07-8041-s002.xlsx]

## Sheet: Table S1
Table S1: List of primers for qRT-PCR analysis of 10 candidate DETFs related to anthocyanin biosynthesis involved in the dynamics growing stages of fleshy roots in carmine radish.
Primer Sequences	Gene ID	Description
F: 5’- CTCCTCGGTAATGCCTCTGT -3’	Cluster_24061	AP2/ERF-ERF
R: 5’-AACCCGATTCTCCGGTTCTT -3’
F: 5’- TGGAACAAGACCTCAGCCAT -3’	Cluster__59539	GRAS
R: 5’-ACGGTCCTCCAACAGCTAAA -3’
F: 5’- AAGCTCTGGATGGCTGAACT -3’	Cluster_44972	B3
R: 5’- GCCTTCAGCGTCAGCATTTA -3’
F: 5’- AATACGCAACCGGACAAAGG -3’	Cluster_22927	NAC
R: 5’- TTCCGTGGAGACGAAACTCA -3’
F: 5’-CCTCGCACGTGCTATTACAG -3’	Cluster_24166	AP2/ERF-ERF
R: 5’- GCAGCAGTTGCCATTAAGGT -3’
F: 5’-TTCGGTGGTAGCATTGGGAT -3’	Cluster_10013	C2C2_Dof
R: 5’-AGAGCACAGAACTGCAGAGT -3’
F: 5’- AACGGATGAGGACTCTGCAA -3’	Cluster_12215	bHLH
R: 5’- ATCAAGGTCCGAACCGAAGT -3’
F: 5’-TCCGAGCAACAGATGACGAA -3’	Cluster_5503	bHLH
R: 5’- CCAAATCTTGCCGTTCCAGT -3’
F: 5’-TGCGATACTCCAGCTTCACT -3’	Cluster_8116	WRKY
R: 5’- GGAACTTCGGATTCCGGTTG -3’
F: 5’- TCCAACCAACCCAGAAGACA-3’	Cluster_16741	C3
R: 5’- TCTTCTCGCACGCTTTCTTG -3’
F: 5’- TATGAGCAAAGAGATCACAGCACT -3’		Actin
R: 5’- TGAGGGAAGCAAGAATGGAA -3’
