# Supplementary material for: Genome-wide analysis of transcription factors related to anthocyanin biosynthesis in carmine radish (Raphanus sativus L.) fleshy roots
Source: PeerJ. 2019 Nov 7;7:e8041. doi: 10.7717/peerj.8041 (PMC6842556; doi:10.7717/peerj.8041)
Supplement: Supplemental Information 6 [file peerj-07-8041-s006.xlsx]

## Sheet: Table S5
Table S5: Prediction of miRNAs related to differential expressed transcription factors (DETFs) association with anthocyanin biosynthesis involved in the dynamics growing stages of flesh roots in carmine radish.
miRNA_Acc.	Target_Acc.	TFs_IDs	Expectation	UPE$	miRNA_start	miRNA_end	Target_start	Target_end	miRNA_aligned_fragment	Target_aligned_fragment	Inhibition	Target_Desc.	Multiplicity
miR1425-5p	Cluster_16851	AP2/ERF-ERF	3.5	11.828	1	19	659	677	UGGAUUGAAUCCUUCUGGU	ACCGAAUGGAUUCAAUUUA	Cleavage		1
miR165a-5p	Cluster_16203	AP2/ERF-ERF	3.5	16.661	1	21	1153	1173	GGAAUGUUGUCUGGAUCGAGG	UAUUGGUCAAGACAGCAUUUU	Cleavage		1
miR166g	Cluster_11321	AP2/ERF-ERF	3.5	12.639	1	21	298	318	GGAAUGUUGUUUGGCUCGAAG	CAUCGACCUAAACCAUAUUUC	Cleavage		1
miR166g-5p	Cluster_11321	AP2/ERF-ERF	3.5	12.639	1	21	298	318	GGAAUGUUGUUUGGCUCGAGG	CAUCGACCUAAACCAUAUUUC	Cleavage		1
miR166h-5p	Cluster_11321	AP2/ERF-ERF	3.5	12.639	1	21	298	318	GGAAUGUUGUUUGGCUCGAGG	CAUCGACCUAAACCAUAUUUC	Cleavage		1
miR166j-5p	Cluster_11321	AP2/ERF-ERF	3.5	12.639	1	21	298	318	GGAAUGUUGUUUGGCUCGAGG	CAUCGACCUAAACCAUAUUUC	Cleavage		1
miR172a-5p	Cluster_10310	AP2/ERF-ERF	3.5	20.899	1	21	256	276	GUAGCAUAAUCAAGAUUCACA	AGAGAAUCCUGAUGAUGCUGC	Cleavage		1
miR172a-5p	Cluster_6812	AP2/ERF-ERF	3	20.899	1	21	256	276	GUGGCAUCAUCAAGAUUCACA	AGAGAAUCCUGAUGAUGCUGC	Cleavage		1
miR172b	Cluster_6812	AP2/ERF-ERF	3	20.899	1	21	256	276	GCAGUAUCAUUAAGAUUCACA	AGAGAAUCCUGAUGAUGCUGC	Cleavage		1
miR172b	Cluster_10310	AP2/ERF-ERF	3	20.899	1	21	256	276	GCAGUAUCAUUAAGAUUCACA	AGAGAAUCCUGAUGAUGCUGC	Cleavage		1
miR172b-5p	Cluster_10310	AP2/ERF-ERF	3.5	20.899	1	21	256	276	GCAGCACCAUCAAGAUUCACA	AGAGAAUCCUGAUGAUGCUGC	Cleavage		1
miR172b-5p	Cluster_6812	AP2/ERF-ERF	3.5	20.899	1	21	256	276	GCAGCACCAUCAAGAUUCACA	AGAGAAUCCUGAUGAUGCUGC	Cleavage		1
miR172c-5p	Cluster_6812	AP2/ERF-ERF	3.5	20.899	1	21	256	276	GGAGCAUCAUCAAGAUUCACA	AGAGAAUCCUGAUGAUGCUGC	Cleavage		1
miR172d-5p	Cluster_10310	AP2/ERF-ERF	3.5	20.899	1	21	256	276	GGAGCAUCAUCAAGAUUCACA	AGAGAAUCCUGAUGAUGCUGC	Cleavage		1
miR172e-5p	Cluster_10310	AP2/ERF-ERF	3.5	20.899	1	21	256	276	GCAACAUCAUCAAGAUUCACA	AGAGAAUCCUGAUGAUGCUGC	Cleavage		1
miR172f-5p	Cluster_6812	AP2/ERF-ERF	3.5	20.899	1	21	256	276	GGAGCAUCAUCAAGAUUCACA	AGAGAAUCCUGAUGAUGCUGC	Cleavage		1
miR395a	Cluster_7379	AP2/ERF-ERF	3	12.612	1	21	1332	1352	UUGAAGUGUUUGGGGGGACUC	GAAAACCCCCAAACACUUCAA	Cleavage		1
miR395b	Cluster_7379	AP2/ERF-ERF	3	12.612	1	21	1332	1352	UUGAAGUGUUUGGGGGAACUC	GAAAACCCCCAAACACUUCAA	Cleavage		1
miR396a-5p	Cluster_34309	AP2/ERF-ERF	3.5	23.386	1	21	287	307	UCCACAGGCUUUCUUGAACUG	UUGUUAAGGAGACUCUGUGGA	Translation		1
miR396b-5p	Cluster_34309	AP2/ERF-ERF	3.5	23.386	1	21	287	307	UCCACAGGCUUUCUUGAACUG	UUGUUAAGGAGACUCUGUGGA	Translation		1
miR396d-5p	Cluster_34309	AP2/ERF-ERF	3.5	23.386	1	21	287	307	UCCACAGGCUUUCUUGAACUG	UUGUUAAGGAGACUCUGUGGA	Translation		1
miR399b-5p	Cluster_7379	AP2/ERF-ERF	3	22.26	1	21	586	606	CAGGGCGCUUCUCCUUUGGCA	ACCCGAAGCAGAAGUGUCUUG	Cleavage		1
miR399c	Cluster_16203	AP2/ERF-ERF	3	12.899	1	21	1005	1025	UGCCAAAGGAGAUUUGCUCAC	UUUAGUAAAUCUGUUUUGGCA	Translation		1
miR399d	Cluster_16203	AP2/ERF-ERF	3	12.899	1	21	1005	1025	UGCCAAAGGAGAUUUGCUCGU	UUUAGUAAAUCUGUUUUGGCA	Translation		1
miR399e	Cluster_16203	AP2/ERF-ERF	3	12.899	1	21	1005	1025	UGCCAAAGGAGAUUUGCUCGG	UUUAGUAAAUCUGUUUUGGCA	Translation		1
miR399f	Cluster_16203	AP2/ERF-ERF	3	12.899	1	21	1005	1025	UGCCAAAGGAGAUUUGCUCAC	UUUAGUAAAUCUGUUUUGGCA	Translation		1
miR827	Cluster_19966	AP2/ERF-ERF	1.5	15.212	1	21	1190	1210	UUAGAUGAACAUCAACAAACA	UAUUUGUUGAUGUUCAUGUAA	Cleavage		1
miR827-3p	Cluster_19966	AP2/ERF-ERF	2.5	15.212	1	21	1190	1210	UUAGAUGACCAUCAACAAAUG	UAUUUGUUGAUGUUCAUGUAA	Translation		1
miR827-3p	Cluster_19966	AP2/ERF-ERF	1.5	15.212	1	21	1190	1210	UUAGAUGAACAUCAACAAACA	UAUUUGUUGAUGUUCAUGUAA	Cleavage		1
miR827a	Cluster_19966	AP2/ERF-ERF	2.5	15.212	1	21	1190	1210	UUAGAUGACCAUCAACAAAUA	UAUUUGUUGAUGUUCAUGUAA	Translation		1
miR827a	Cluster_19966	AP2/ERF-ERF	2.5	15.212	1	21	1190	1210	UUAGAUGACCAUCAACAAAUA	UAUUUGUUGAUGUUCAUGUAA	Translation		1
miR854	Cluster_34309	AP2/ERF-ERF	3.5	23.19	1	22	416	437	GAUGAGGAGAGUGAGGAAGGUG	CAUCUUCCUCUUCUUCUUCAUC	Translation		1
miR854a	Cluster_3571	AP2/ERF-ERF	3.5	13.127	1	21	650	670	GAUGAGGAUAGGGAGGAGGAG	UACAACCUCCCUAUCCUUAUC	Cleavage		3
miR854b	Cluster_3571	AP2/ERF-ERF	3.5	13.127	1	21	650	670	GAUGAGGAUAGGGAGGAGGAG	UACAACCUCCCUAUCCUUAUC	Cleavage		3
miR854c	Cluster_3571	AP2/ERF-ERF	3.5	13.127	1	21	650	670	GAUGAGGAUAGGGAGGAGGAG	UACAACCUCCCUAUCCUUAUC	Cleavage		3
miR854d	Cluster_3571	AP2/ERF-ERF	3.5	13.127	1	21	650	670	GAUGAGGAUAGGGAGGAGGAG	UACAACCUCCCUAUCCUUAUC	Cleavage		3
miR854e	Cluster_3571	AP2/ERF-ERF	3.5	13.127	1	21	650	670	GAUGAGGAUAGGGAGGAGGAG	UACAACCUCCCUAUCCUUAUC	Cleavage		3
miR863-5p	Cluster_7379	AP2/ERF-ERF	3.5	16.83	1	21	1482	1502	UUGUGUCUUGUUUGAUCUCUA	AUGAGAUCGGACAAGAGAUGA	Cleavage		1
miR5815	Cluster_24289	AUX/IAA	3.5	17.246	1	24	822	845	AAUGUUGAUGGACAUAGACUGACC	UCUUUGUUUAGGUCCAUUGAUGUU	Cleavage		1
miR1432-5p	Cluster_17168	bHLH	3	18.154	1	21	963	983	UAGGAGAAGAUGACUCGGACG	UCUCCGAGUUUUCUUCUUCUU	Translation		1
miR408a	Cluster_9926	bHLH	3.5	16.984	1	24	1081	1104	AGAGACAGGGAACAAGCAGAGCAU	CUCUUCUUCUUGUUAGUUGUCUCU	Translation		1
miR169j-3p	Cluster_5780	bHLH	3.5	10.468	1	22	1695	1715	GCUCACUUCUCUCUCUGUCAGU	UAAGACAGAGA-AGAAGAGAGC	Translation		1
miR319d-5p.2	Cluster_5780	bHLH	3.5	16.604	1	21	999	1019	UCACUCCUCUUCUUCAUGAUG	AGGAAUGAGGAAGCGGAGUGA	Cleavage		1
miR399	Cluster_5780	bHLH	3.5	21.093	1	21	1269	1289	UUUCGACGAGUUGUUCUUGGC	AACGAGAACGUUUCGUUGAAG	Translation		1
miR847-3p	Cluster_5780	bHLH	3.5	24.771	1	22	440	461	GGGCACCUCUCACUUAGGCAGG	GAUGCUUGAGUCGGAGGUGUUC	Translation		1
miR395n	Cluster_32426	bHLH	3	21.695	1	22	237	258	GGCAAGUCUGUCCUUGGCUACA	UGAAGCUAACGAAAGAUUUGCC	Translation		1
miR395k	Cluster_27221	bHLH	3.5	13.16	1	21	204	224	UCUCGUUGUCUGUUCGACCUU	CAGGAAGAACGGAUAAUGAGA	Cleavage		1
miR482e-5p	Cluster_17168	bHLH	3.5	17.067	1	20	1005	1023	UCGAUAAACCUCUGCAUCCA	CGGAUUUAG-GGUUUAUCGA	Translation		1
miR158-3p	Cluster_16130	bHLH	3	10.731	1	21	1088	1108	UGUGGGUGGGGUGGAAAGAUU	UCUCUUUCUGACACACCCACA	Translation		1
miR396-3p	Cluster_16130	bHLH	2.5	19.074	1	21	1363	1383	UUUCCAAAUGUAGACAAAGCA	GCUUUUGUCUUCGUUUGGAAG	Translation		1
miR408b	Cluster_12241	C2C2-CO-like	3.5	4.838	1	21	698	718	ACAGGGAAGAGGUAGAGCAUG	CCUGUUCUUCCUCUUCUCUCU	Cleavage		1
miR408c	Cluster_12241	C2C2-CO-like	3.5	4.838	1	21	698	718	ACAGGGAAGAGGUAGAGCAUG	CCUGUUCUUCCUCUUCUCUCU	Cleavage		1
miR408d	Cluster_12241	C2C2-CO-like	3.5	4.838	1	21	698	718	ACAGGGAAGAGGUAGAGCAUG	CCUGUUCUUCCUCUUCUCUCU	Cleavage		1
miR172d	Cluster_23883	C2C2-Dof	3.5	12.331	1	24	167	189	UUGGGAAUCUUGAUGAUGCUGCAU	AAAUGGCGUCC-CAAGAUUCCCAA	Cleavage		1
miR398a-5p	Cluster_10013	C2C2-Dof	3.5	22.585	1	22	323	344	GGAGUGACACUGAGAACACAAG	GGAGGGUUCUCGUUGUUACUCU	Translation		1
miR408a	Cluster_10013	C2C2-Dof	3.5	11.715	1	24	1325	1348	AGAGACAGGGAACAAGCAGAGCAU	UCUUCCUCUUUGUCCCCUGUCUCG	Translation		2
miR408b-5p	Cluster_10013	C2C2-Dof	3.5	13.305	1	21	499	519	ACGGGGACGAGACAGAGCAUG	GUUCCUCUGUUUCCUCUCUGU	Cleavage		1
miR5227	Cluster_11414	C2C2-GATA	3.5	16.556	1	20	1513	1531	UGAAGAGUAGAAGAUAAGAA	UUUUUAUUUUUU-CUCUUCA	Cleavage		1
miR831-5p	Cluster_11414	C2C2-GATA	3.5	17.367	1	24	1078	1101	AGAUGAGGACGAGGAAGAUGAUGA	AACGAAUCUUCCUUCUUCUCAACU	Translation		2
miR831-5p	Cluster_14185	GARP-ARR-B	3.5	16.018	1	24	921	944	AGAUGAGGACGAGGAAGAUGAUGA	UCAUCAUCUUCUUCCUCUUCUUCU	Translation		1
miR171b-3p	Cluster_31029	GRAS	3.5	20.996	1	21	126	146	UUGAGCCGUGCCAAUAUCACG	GAUGAUGAUGGCAGGGUUCAG	Cleavage		1
miR171c-3p	Cluster_31029	GRAS	3.5	20.996	1	21	126	146	UUGAGCCGUGCCAAUAUCACG	GAUGAUGAUGGCAGGGUUCAG	Cleavage		1
miR403-5p	Cluster_31029	GRAS	3.5	11.83	1	22	615	636	UGUUUUGUGCUUGAAUCUAAUU	GCAUAGAGUUAAACACGAAAUA	Translation		1
miR167f-3p	Cluster_10558	HB-HD-ZIP	3.5	19.29	1	21	1392	1412	AGAUCAUGUGGCAGUUUCACC	AUCGGAGCUUCCACGUGAUCU	Cleavage		1
miR167g-3p	Cluster_10558	HB-HD-ZIP	3.5	19.29	1	21	1392	1412	AGAUCAUGUGGCAGUUUCACC	AUCGGAGCUUCCACGUGAUCU	Cleavage		1
miR167h-3p	Cluster_10558	HB-HD-ZIP	3.5	19.29	1	21	1392	1412	AGAUCAUGUGGCAGUUUCACC	AUCGGAGCUUCCACGUGAUCU	Cleavage		1
miR396a-3p	Cluster_29385	LOB	3.5	14.239	1	21	832	852	GUUCAAGAAAGUCCUUGGAAA	GGUCAAAGGAUGUUUUUGAAU	Translation		1
miR396b-3p	Cluster_29385	LOB	3.5	14.239	1	20	833	852	GUUCAAGAAAGUCCUUGGAA	GUCAAAGGAUGUUUUUGAAU	Translation		1
miR858	Cluster_27519	MYB	3.5	16.941	1	21	350	370	CUGAAGAGUCUGGAGGAACUC	AAGUUCUUGUAGCUUCUUCAG	Translation		1
miR395w	Cluster_18237	MYB	3.5	21.901	1	21	503	523	UUGAAGCGUUUGGGGGAACUC	CGGUUGUACCAAACGUUUCGA	Cleavage		1
miR858	Cluster_18237	MYB	3.5	16.567	1	21	514	534	UCUCGUUGUCUGUUCGACCUU	CAGGAAGAACGGAUAAUGAGA	Cleavage		1
miR162	Cluster_18223	MYB	3.5	9.219	1	22	173	194	GUGAAGUGUUUGGGGGAUUCUC	UACAAAACUUCAAACAUUUCAC	Cleavage		1
miR162-3p	Cluster_18223	MYB	3.5	17.067	1	21	1004	1023	UCGAUAAACCUCUGCAUCCAG	CCGGAUUUAG-GGUUUAUCGA	Translation		1
miR162-3p	Cluster_18223	MYB	3.5	17.067	1	21	1004	1023	UCGAUAAACCUCUGCAUCCAG	CCGGAUUUAG-GGUUUAUCGA	Translation		1
miR162-3p	Cluster_18223	MYB	3.5	17.067	1	21	1004	1023	UCGAUAAACCUCUGCAUCCAG	CCGGAUUUAG-GGUUUAUCGA	Translation		1
miR162a-3p	Cluster_18223	MYB	3.5	13.775	1	24	320	343	AUGGUUCAAGAAAGCCCAUGGAAA	ACAAAAUGGACUUCUUUGAGCUAU	Translation		1
miR162a-3p	Cluster_18223	MYB	3	13.775	1	24	320	343	AUAGUUCAAGAAAGUCCUUGGAAA	ACAAAAUGGACUUCUUUGAGCUAU	Translation		1
miR162a-3p	Cluster_18223	MYB	3.5	17.067	1	21	1004	1023	UCGAUAAACCUCUGCAUCCAG	CCGGAUUUAG-GGUUUAUCGA	Translation		1
miR162b	Cluster_18223	MYB	3.5	17.067	1	21	1004	1023	UCGAUAAACCUCUGCAUCCAG	CCGGAUUUAG-GGUUUAUCGA	Translation		1
miR162b	Cluster_18223	MYB	3.5	17.067	1	21	1004	1023	UCGAUAAACCUCUGCAUCCAG	CCGGAUUUAG-GGUUUAUCGA	Translation		1
miR162b	Cluster_18223	MYB	3.5	17.067	1	21	1004	1023	UCGAUAAACCUCUGCAUCCAG	CCGGAUUUAG-GGUUUAUCGA	Translation		1
miR162b	Cluster_18223	MYB	3.5	17.067	1	21	1004	1023	UCGAUAAACCUCUGCAUCCAG	CCGGAUUUAG-GGUUUAUCGA	Translation		1
miR162b-3p	Cluster_18223	MYB	3.5	17.067	1	21	1004	1023	UCGAUAAACCUCUGCAUCCAG	CCGGAUUUAG-GGUUUAUCGA	Translation		1
miR162b-3p	Cluster_18223	MYB	3.5	17.067	1	21	1004	1023	UCGAUAAACCUCUGCAUCCAG	CCGGAUUUAG-GGUUUAUCGA	Translation		1
miR162b-3p	Cluster_18223	MYB	3.5	17.067	1	21	1004	1023	UCGAUAAACCUCUGCAUCCAG	CCGGAUUUAG-GGUUUAUCGA	Translation		1
miR162c	Cluster_18223	MYB	3.5	17.067	1	21	1004	1023	UCGAUAAACCUCUGCAUCCAG	CCGGAUUUAG-GGUUUAUCGA	Translation		1
miR396e-3p	Cluster_18223	MYB	3.5	17.067	1	21	1004	1023	UCGAUAAACCUCUGCAUCCAG	CCGGAUUUAG-GGUUUAUCGA	Translation		1
miR396f-3p	Cluster_18223	MYB	3.5	17.067	1	21	1004	1023	UCGAUAAACCUCUGCAUCCAG	CCGGAUUUAG-GGUUUAUCGA	Translation		1
miR166d-5p	Cluster_16044	MYB	3.5	17.23	1	21	332	352	GUCCAAGAAAGCUGUGGGAAA	GUUCUCACUUCUUACUUGGAC	Cleavage		1
miR166e-5p	Cluster_16044	MYB	3	5.504	1	21	144	164	GGAAUGUUGUCUGGUUGGAGA	CAUCUAACCACAUAACGUUUC	Translation		1
miR166g-5p	Cluster_16044	MYB	3.5	7.844	1	22	161	182	UGUUUUGUGCUUGAAUCUAAUU	UUUCAAGUUCAACCACAAAACA	Translation		1
miR403-5p	Cluster_16044	MYB	3	5.504	1	21	144	164	GGAAUGUUGUCUGGUUGGAGA	CAUCUAACCACAUAACGUUUC	Translation		1
miR858	Cluster_14627	MYB	3	5.504	1	21	144	164	GGAAUGUUGUCUGGUUGGAGA	CAUCUAACCACAUAACGUUUC	Translation		1
miR823-3p	Cluster_6463	MYB-related	3.5	9.409	1	24	2129	2152	UUAGGUUGGUAGAUCAUGAUGGUU	AAUUUUCAUAAUUUACCAGUUUAG	Cleavage		1
miR156a-3p	Cluster_6463	MYB-related	3.5	11.662	1	21	845	865	UCAUCUUCAUCAUCAUCGUCA	CAACGAAGAUCAUGAAGAAGA	Translation		1
miR156b-3p	Cluster_6463	MYB-related	3.5	10.468	1	22	1695	1715	GCUCACUUCUCUCUCUGUCACC	UAAGACAGAGA-AGAAGAGAGC	Translation		1
miR156c-3p	Cluster_6463	MYB-related	3.5	10.468	1	22	1695	1715	GCUCACUUCUCUCUCUGUCAGC	UAAGACAGAGA-AGAAGAGAGC	Translation		1
miR156e-3p	Cluster_6463	MYB-related	3.5	10.468	1	22	1695	1715	GCUCACUUCUCUCUCUGUCAGC	UAAGACAGAGA-AGAAGAGAGC	Translation		1
miR156g-3p	Cluster_6463	MYB-related	3.5	10.468	1	22	1695	1715	GCUCACUUCUCUCUCUGUCAGC	UAAGACAGAGA-AGAAGAGAGC	Translation		1
miR169c-3p	Cluster_4333	MYB-related	3.5	16.364	1	21	680	700	UGGCUGAGUCGAAGGUUGUGC	GGACAACCCUUGAGUCAGUUA	Cleavage		1
miR169l-3p	Cluster_4333	MYB-related	2.5	21.695	1	22	237	258	GGCAAGUUUUUCCUUGGCUAUA	UGAAGCUAACGAAAGAUUUGCC	Cleavage		1
miR169a-3p	Cluster_40533	NF-YA	3	12.324	1	21	233	253	GGCAAGUUGUUCUUGGCUACA	AGUAGCCAAGGAUGACUUCCC	Cleavage		1
miR169b-3p	Cluster_40533	NF-YA	3	12.324	1	21	233	253	GGCAAGUUGUUCUUGGCUACA	AGUAGCCAAGGAUGACUUCCC	Cleavage		1
miR169r-3p	Cluster_40533	NF-YA	2.5	12.324	1	21	233	253	GGCAAGUUGUCCUUGGCUACA	AGUAGCCAAGGAUGACUUCCC	Cleavage		1
miR164a	Cluster_8711	Trihelix	3.5	15.391	1	21	57	77	UGGAGAAGCAGGGCACUUGCU	ACCAGCUGCUCUGUUUCUCUG	Cleavage		1
miR164b	Cluster_8711	Trihelix	3.5	15.391	1	21	57	77	UGGAGAAGCAGGGCACUUGCU	ACCAGCUGCUCUGUUUCUCUG	Cleavage		1
miR319-5p	Cluster_8116	WRKY	3.5	13.165	1	21	183	203	AGGAAACUGUUUAGUCCAACC	ACUUUGAUUAGACAGUUUCAU	Cleavage		1
miR395b	Cluster_8116	WRKY	3.5	19.004	1	21	989	1009	GUUCCCUUUAACGCUUCAUUG	UUAUGAAACCCUAAAGGGGAC	Translation		1
miR535b	Cluster_8116	WRKY	3.5	15.366	1	21	59	79	UGAACAAGGAAAGAGAGCAGG	AGUUUUUUUUUUUUUUGUUCA	Cleavage		1
